**Title:** Spatial variation in exploited metapopulations obscures risk of collapse

**Authors:** Daniel K Okamoto<sup>a,b,c\*</sup>, Margot Hessing-Lewis<sup>b</sup>, Jameal F Samhour<sup>d</sup>, Andrew O

Shelton<sup>d</sup>, Adrian Stier<sup>e</sup>, Philip S Levin<sup>f,g</sup> and Anne K Salomon<sup>b,c</sup>

a: Department of Biological Science, Florida State University

b: Hakai Institute

c: School of Resource and Environmental Management, Simon Fraser University

d: Conservation Biology Division, Northwest Fisheries Science Center, National Marine Fisheries Service, National Oceanic and Atmospheric Administration

e: Department of Ecology, Evolution, and Marine Biology, University of California, Santa Barbara

f: The Nature Conservancy

g: School of Environment and Forestry Sciences, University of Washington

\*corresponding author: [dokamoto@bio.fsu.edu](mailto:dokamoto@bio.fsu.edu)

**Running Head:** Cryptic collapses in metapopulations

**Author contributions:**

DKO designed, built and conducted analyses. AS conducted the home-range literature review.

DKO and AKS wrote the initial manuscript draft. DKO, MHL, JFS, AOS, AS, PSL, and AKS initiated the research focus, refined analyses and contributed to revisions.

## 1 **Abstract**

2 Unanticipated declines among exploited species have commonly occurred despite harvests that  
3 appeared sustainable prior to collapse. This is particularly true in the oceans where spatial scales  
4 of management are often mismatched with spatially complex metapopulations. We explore  
5 causes, consequences and potential solutions for spatial mismatches in harvested  
6 metapopulations in three ways. First, we generate novel theory illustrating when and how  
7 harvesting metapopulations increases spatial variability and in turn masks local scale volatility.  
8 Second, we illustrate why spatial variability in harvested metapopulations leads to negative  
9 consequences using an empirical example of a Pacific herring metapopulation. Finally, we  
10 construct a numerical management strategy evaluation model to identify and highlight potential  
11 solutions for mismatches in spatial scale and spatial variability. Our results highlight that spatial  
12 complexity can promote stability at large scales, however ignoring spatial complexity produces  
13 cryptic and negative consequences for people and animals that interact with resources at small  
14 scales. Harvesting metapopulations magnifies spatial variability, which creates discrepancies  
15 between regional and local trends while increasing risk of local population collapses. Such  
16 effects asymmetrically impact locally constrained fishers and predators, which are more exposed  
17 to risks of localized collapses. Importantly, we show that dynamically optimizing harvest can  
18 minimize local risk without sacrificing yield. Thus, multiple nested scales of management may  
19 be necessary to avoid cryptic collapses in metapopulations and the ensuing ecological, social and  
20 economic consequences.

21

22 **Keywords:** Sustainable fisheries, Metapopulation, Population Dynamics, Conservation, Natural  
23 Resource Management

## 24 **Introduction**

25 Mismatches in spatial scale create pervasive problems in ecology and natural resource  
26 management (Cumming et al. 2006, Cope and Punt 2011). This problem occurs in part because  
27 the spatial extent of management or conservation units is often defined by history, jurisdictional,  
28 or institutional criteria rather than the scale of social and ecological processes at play (Levin  
29 1992, Chesson 1998, Cumming et al. 2006). Such choices concerning the scale of management  
30 can result in spatial mismatches, where feedbacks controlling interactions among groups occur at  
31 different scales. In managed ecosystems like forestry and fisheries, mismatches may occur when  
32 harvest recommendations are based on trends in large-scale abundance without accounting for  
33 localized collapses (Johnson et al. 2012) or spatial variation in population structure and harvest  
34 rates (Cope and Punt 2011). Yet these spatially isolated collapses can have far-reaching  
35 consequences when the species play an indispensable role in local social-ecological systems,  
36 including human communities with limited capacity to forage over wide geographic scales.  
37 Empirical identification of appropriate spatial scales of management remains difficult for  
38 spatially structured populations, but can be a pre-requisite for diagnosing and reconciling  
39 challenges that spatial mismatches impose on the sustainable and equitable use of natural  
40 resources.

41

42 In metapopulations – plant or animal populations connected through dispersal – it is well  
43 established that the dynamics of individual populations can differ substantially from the  
44 aggregate metapopulation (Chesson 1998, Mangel and Levin 2005, Melbourne and Chesson  
45 2006). A combination of movement, shared climate drivers, and compensatory processes  
46 determine whether dynamics of individual populations reflect the dynamics of the aggregate

47 metapopulation (Kendall et al. 2000). Consideration of metapopulation structure has improved  
48 the management of the spotted owl (*Strix occidentalis*) (Lande 1988), salmon (*Onchorhynchus*  
49 spp.) (Stephenson 1999, Rieman and Dunham 2000, Schtickzelle and Quinn 2007, Peterson et al.  
50 2014), amphibians (Marsh and Trenham 2001), and mosquitoes (Adams and Kapan 2009). To  
51 date, efforts to integrate metapopulation dynamics into natural resource management have  
52 largely focused on either minimizing the risk of localized extinction (Chadès et al. 2011),  
53 characterizing productivity of the metapopulation as a whole (sensu Takashina and Mougi 2015),  
54 or valuing benefits of portfolio effects (i.e. stabilizing effects of spatial asynchrony sensu  
55 Schindler et al. 2010). Less understood, both in theory and in practice, is if and when harvesting  
56 metapopulations can increase spatial variability that yield mismatches in spatial scales of  
57 management and population dynamics.

58  
59 In this study, we assess how harvest dynamics interact with animal movement and recruitment to  
60 shape spatial population variability and risk of collapse at different spatial scales. Our results  
61 illustrate the challenge in managing spatially complex populations using three complementary  
62 approaches. First, we develop new theory using a stochastic analytical model to examine when  
63 and how harvesting in a metapopulation amplifies spatial variability that can create mismatches  
64 in spatial scale. Second, we contextualize the problem of spatial variability and mismatches in  
65 spatial scale by presenting historical analyses from spatial Pacific herring (*Clupea pallasii*)  
66 fisheries in British Columbia, Canada and home-ranges of associated predators and fishers that  
67 may be impacted by localized collapses. Finally, we evaluate how and when different harvest  
68 management approaches can ameliorate such mismatches using a numerical risk analysis in  
69 Pacific herring fisheries.

70

71 ***Pacific herring case study in British Columbia's Central Coast***

72 Pacific herring exemplify the challenges inherent to managing metapopulations that exhibit  
73 spatial variation in population trends. In British Columbia (BC), Canada, herring return annually  
74 to nearshore coastlines in the late winter/early spring to reproduce. During this annual migration,  
75 they are harvested and preyed upon by a range of consumers. Mobile commercial fishing fleets  
76 harvest adult herring, largely for their roe, in the days prior to spawning. In contrast, Indigenous  
77 fishers are constrained to a local area and largely harvest eggs after spawning events (though  
78 some adults as well) as an important food, trade, and cultural resource (Lepofsky and Caldwell  
79 2013, McKechnie et al. 2014, Department of Fisheries and Oceans 2015, von der Porten et al.  
80 2016, Okamoto et al. 2019). These activities create trade-offs among commercial roe fisheries  
81 that remove spawning adults, which truncates adult age structure and reduces abundance, versus  
82 those that remove only eggs from shorelines (Shelton et al. 2014). Unfortunately, a core  
83 uncertainty for herring management, as for many species, is the extent of movement between  
84 areas (Flostrand et al. 2009, Benson et al. 2015, Jones et al. 2016, Levin et al. 2016). Similar  
85 uncertainty surrounds spatial variation in spawning biomass (Siple and Francis 2016), which  
86 may result in part from the degree of demographic synchrony between areas (e.g. synchrony in  
87 recruitment). Pacific herring in British Columbia are currently managed as stocks at regional  
88 scales (100s of kilometers) by Canada's federal fisheries agency. Within these stocks, multiple  
89 spawning aggregations (substocks) seasonally occupy individual stretches of coastline, many of  
90 which are of important traditional and cultural value to Indigenous groups. Thus, Pacific herring  
91 fisheries present a valuable system in which to explore how spatial population dynamics, scales

92 of management, and spatial constraints of fishers and predators interact to influence differential  
93 risk exposure to population collapses.

94

## 95 **Methods**

### 96 *Methodological Overview*

97

98 We used three distinct modeling approaches in this study to explore how harvest can affect  
99 spatial dynamics in metapopulations. In **Model 1**, we developed a novel analytical approach to  
100 modeling stochastic age-structured metapopulations to illustrate how and when harvest can  
101 interact with migration and both the magnitude and spatial synchrony of environmental  
102 stochasticity. We illustrated these important interactions using this model because of its  
103 simplicity and interpretability relative to more complicated nonlinear numerical models. In  
104 **Model 2**, we analyzed Pacific herring data from British Columbia using a Bayesian hierarchical  
105 model to estimate spatiotemporal variation in spawning biomass and harvest rates. In **Model 3**,  
106 to evaluate potential solutions for spatial mismatches and conditions for their success, we  
107 developed and applied a spatially explicit stochastic numerical model of metapopulations and  
108 their interaction with the fishery. Together, these approaches (Models 1-3) generate theoretical,  
109 empirical, and numerical results for understanding the complex, spatially-structured interactions  
110 among populations, harvest, and environmental variability. The collective results are then  
111 applied to evaluate the consequences for the availability of important natural resources for both  
112 human and non-human user groups.

113

114 ***Theoretical effects of harvest on spatial variability in metapopulations (Model 1)***

115 We used a simple metapopulation model to evaluate how harvest alters spatial variability,  
116 conditional on the underlying properties of the metapopulation. For our purposes, spatial  
117 variability is the degree to which volatility of the populations are masked by the observed  
118 volatility of the metapopulation.

119

120 We considered a simple metapopulation consisting of two populations, linked through the annual  
121 fraction migrating between populations ( $\delta$ ). We assumed both populations have the same  
122 dynamics (identical density independent adult total mortality rate ( $Z$ ), maturity at age 2,  
123 Gompertz stock-recruit relationship, and symmetric adult annual migration) and trends in  
124 recruitment variability are controlled by a spatially correlated lognormal environmental  
125 stochasticity.

126

127 Let represent the abundance of age class  $a$  at location  $i$  at time  $t$  as  $Y_{a,i,t}$ . Adult dynamics are  
128 shaped by mortality ( $Z$  - the sum of mortality from natural causes and harvest) and migration  
129 ( $0 \leq \delta \leq 0.5$ ):

130 **Eq. 1:** 
$$Y_{a,i,t+1} = \begin{cases} e^{-Z}[(1 - \delta)Y_{a-1,i,t} + \delta Y_{a-1,j,t}] & 2 \leq a \leq n - 1 \\ e^{-Z}[(1 - \delta)(Y_{a-1,i,t} + Y_{a,i,t}) + \delta(Y_{a-1,j,t} + Y_{a,j,t})] & a = n \text{ (plus group)} \end{cases}$$

131 Total reproduction is the sum of adults across all adult age classes multiplied by 0.5 to account  
132 for an equal sex ratio:

133 **Eq. 2:** 
$$Y_{a=0,i,t+1} = 0.5e^{-Z} \sum_{a=1}^n ((1 - \delta)Y_{a,i,t} + \delta Y_{a,j,t})$$

134 Both Eq. 1 and 2 are identical for both subpopulations (i.e. the system is symmetrical). We used  
135 a stochastic Gompertz model as the compensatory function that determines how zygotes translate  
136 into one-year-olds:

137 **Eq. 3:**  $Y_{a=1,i,t+1} = \alpha(Y_{a=0,i,t})^{1-\beta} e^{\zeta_{i,t}}$

138  $\alpha$ ,  $\beta$  and  $\zeta_{i,t}$  represent, respectively, the density independent productivity parameter, the within-  
139 location compensatory parameter, and environmental stochasticity that operates on post-  
140 dispersing larvae. The vector  $\xi_t = [\zeta_{1,t}, \zeta_{2,t}]'$  follows a multivariate normal distribution with  
141 mean zero and covariance controlled by the common within-site variance ( $\sigma_R^2$ ) and spatial

142 correlation ( $\rho_R$ ) yielding  $\text{cov}[\zeta_{1,t}, \zeta_{2,t}] = \begin{bmatrix} \sigma_R^2 & \sigma_R^2 \rho_R \\ \sigma_R^2 \rho_R & \sigma_R^2 \end{bmatrix}$ .

143

144 To analyze the stochastic metapopulation model, we converted the model to a first order vector  
145 autoregressive model where statistical properties of stochastic forcing in multivariate systems are  
146 well described (Lütkepohl 2005). We first vectorized the model by aligning variables from both  
147 populations in a single vector:

148  $\mathbf{Y}_t = [Y_{a=0,L=1,t} \quad \cdots \quad Y_{n,L=1,t} \quad Y_{a=0,L=2,t} \quad \cdots \quad Y_{n,L=2,t}]'$

149 We then cast the model in terms of log-scale deviations from the equilibrium (i.e.  $x_{a,i,t} =$   
150  $\ln Y_{a,i,t} - \ln Y_{a,i}^*$  where  $Y_{a,i}^*$  is the equilibrium) and linearized about the equilibrium (Nisbet and  
151 Gurney 1982, Bjørnstad et al. 2004) to create a first order vector autoregressive model. This  
152 approach approximates the deterministic dynamics of the nonlinear model with a Jacobian matrix  
153 ( $\mathbf{J}$ ) of first order dependencies and an environmental covariance matrix.

154



155 The matrix of Jacobian coefficients (with plus groups summed at age  $n$ ) are partial derivatives  
 156 for each age class within each subpopulation with respect to each other age class in each  
 157 subpopulation.  $\mathbf{J}$  can be represented by the block matrix comprised of matrices describing  
 158 among and within population age transitions:

159 **Eq. 4:**  $\mathbf{J} = \begin{bmatrix} J_1 & J_2 \\ J_2 & J_1 \end{bmatrix}$

160 Where  $J_1$  is within population dynamics and  $J_2$  is among population dynamics defined by:

161 **Eq. 5:**  $J_i =$

162 
$$\begin{bmatrix} 0 & \frac{D}{1+\sum_{a=1}^{n-1}(e^{-Z})^a} & \frac{D(e^{-Z})}{1+\sum_{a=1}^{n-1}(e^{-Z})^a} & \frac{D(e^{-Z})^2}{1+\sum_{a=1}^{n-1}(e^{-Z})^a} & \dots & \frac{D(e^{-Z})^{n-2}}{1+\sum_{a=1}^{n-1}(e^{-Z})^a} & \frac{D(e^{-Z})^{n-1}}{1+\sum_{a=1}^{n-1}(e^{-Z})^a} \\ 1 - \beta & 0 & 0 & 0 & \dots & 0 & 0 \\ 0 & D & 0 & 0 & \dots & 0 & 0 \\ 0 & 0 & D & 0 & \dots & 0 & 0 \\ \vdots & \vdots & \vdots & \vdots & \ddots & 0 & 0 \\ 0 & 0 & 0 & 0 & \dots & \frac{D}{(e^{-Z})+1} & \frac{D(e^{-Z})}{(e^{-Z})+1} \end{bmatrix}$$

163 If  $J_i = J_1$ ,  $D = (1 - \delta)$  and if  $J_i = J_2$ ,  $D = \delta$ .  $Z$  is the annual total mortality rate and  $n$  is the  
 164 number of age classes. See Appendix S1 for full derivation of the Jacobian and VAR(1)  
 165 properties. The resulting VAR(1) model is:

166 **Eq. 6:**  $\mathbf{x}_t = \mathbf{J}\mathbf{x}_{t-1} + \mathbf{Z}\boldsymbol{\xi}_t$

167 **Eq. 7:**  $\mathbf{x}_t = [x_{a=0,L=1,t} \quad \dots \quad x_{n,1,t} \quad x_{a=0,L=2,t} \quad \dots \quad x_{n,2,t}]'$

168  $\mathbf{Z}$  is a  $2n \times 2$  binary matrix (2 age classes for each location, two locations) that controls which of  
 169 the entries in  $\mathbf{x}_t$  are subject to stochasticity from  $\boldsymbol{\xi}_t$  (i.e. translating the  $2 \times 1$  vector of location  
 170 specific stochasticity to a  $2n \times 1$  sparse vector). In this case, only age class 1 (corresponding to  
 171 the second column of  $J_1$ ) for each subpopulation is subject to stochasticity.

172

173 We used the known statistical properties of a VAR(1) model (Lütkepohl 2005) in tandem with  
174 the moments of a multivariate lognormal to derive the coefficient of variation for the  
175 subpopulations and metapopulation that yields the spatial variation in the metapopulation.  
176 Finally, to evaluate how local environmental sensitivity of population growth changes with  
177 mortality rate, we used a first-order impulse response analysis (Lütkepohl 2005) to estimate the  
178 annual intrinsic growth rate response to a recruitment pulse. The impulse response in our case  
179 describes how a recruitment perturbation affects the intrinsic growth rate of each subpopulation.  
180 Specifically, it is given by the entry of the 2<sup>nd</sup> column of the 1<sup>st</sup> row of the Jacobian matrix in Eq.  
181 5. See Appendix S1 for full derivations and details.

182

### 183 ***Pacific herring case-study: spatial variability in biomass and catch (Model 2)***

184 To estimate patterns of spatial and temporal variability in herring biomass and harvest rates, we  
185 used spawn deposition and harvest data for six major Pacific Herring spawning units that  
186 comprise the Central Coast stock in British Columbia, Canada. Briefly, SCUBA surveys are  
187 used to estimate herring egg abundance which is converted to total spawning biomass with the  
188 assumed conversion of ~100 eggs/g and an equal sex ratio (DFO 2015). For consistency we use  
189 the same index as in the DFO stock assessment but in the spatially disaggregated form. Catch  
190 (which occurs in the days prior to spawning) is reported by geographic section that are delineated  
191 and aggregated geographically. For full description of the time series see DFO (2015) and  
192 references therein.

193

194 To estimate spatial biomass trends from the survey and harvest time series observations, we used  
195 a nonlinear model in a Bayesian hierarchical state-space framework. We assumed survival,

196 reproduction, and competition were location specific. We modeled expected change in biomass  
197 in year  $t+1$  using a combined growth and survival model (individual growth and survival from  
198 year  $t$ ) and Gompertz recruitment model (from year  $t-1$ , because fish mature at or after age 2 -  
199 Table 1, Eq. 8).

200

201 We estimated both process error and observation error in the model. We estimated spatially  
202 correlated process error that represents deviations from the expected log-scale pre-harvest  
203 biomass within each location. Process error may arise from a diverse combination of factors  
204 including immigration or emigration and temporal variation in growth, recruitment, or mortality  
205 (Table 1, Eq. 9). We also estimated location-specific observation error (Objective function -  
206 Table 1, Eq. 10), and a common survey bias (a “catchability” coefficient quantifying the mean  
207 proportion of eggs that are observed in fishery-independent surveys - Table 1, Eq. 10). Thus, we  
208 estimated trends conditional on estimated survival, biomass growth, process error covariance,  
209 observation error, and survey bias.

210

211 Because we estimated log-scale pre-harvest biomass but observations are of post-harvest  
212 biomass and harvested biomass, the model requires a change of variables and thus the posterior  
213 requires a Jacobian adjustment of the inverse transform (Gelman et al. 2013, Carpenter et al.  
214 2016, Table 1, Eqs 10, 11). See Table 1 for all model equations, parameter definitions, and prior  
215 distributions. For details of estimation, posteriors, and model validation, see Appendix S2. We  
216 estimated the models using Stan (Stan Development Team 2016b, a) with 3 independent Markov  
217 Chains with 1000 iteration chains after 1000 iteration burn-in. We confirmed chain mixing and  
218 convergence using Gelman-Rubin statistic ( $R < 1.01$ , Gelman and Rubin 1992) and for mdel

219 adequacy and model fit using posterior predictive checks (see below). Posteriors compared with  
220 priors for core parameters are shown in Appendix S2: Fig. S1.

221  
222 We used the full model posterior of post-harvest biomass to calculate the following metrics: 1)  
223 temporal and spatial variation in biomass (see Appendix S2: Fig. S1), and 2) the exploitation  
224 rate. We compared the estimated local harvest rates from the model posterior to the theoretical  
225 proportional allocation where fishing mortality is constant in space and an optimized allocation  
226 of harvest given the quota (see Appendix S2: Fig. S3 for results, Appendix S3 for methods) and  
227 the posterior mean. Here, we defined “optimized allocation” of catch as one that distributes  
228 catches in space according to the ideal free distribution (see Appendix S3 for methods). This  
229 distribution removes proportionally more biomass from subpopulations with higher biomass and  
230 is the spatial allocation of catch that minimizes effort to achieve the overall quota (assuming  
231 catch per unit effort is linearly related to biomass).

232  
233 ***Solutions for spatial scale mismatches in fished herring metapopulations (Model 3)***

234 We used a stochastic model to simulate how spatial metapopulation dynamics and alternative  
235 management scenarios interact to influence risk of collapse at the subpopulation and  
236 metapopulation scales under a diverse suite of scenarios. The scenarios we examined include a  
237 factorial gradient of 1) annual movement (see Annual adult migration among spawning areas  
238 below), 2) environmental recruitment synchrony (the degree of correlation in recruitment in  
239 space – see Spatiotemporal Recruitment Dynamics below), 3) a range of harvest rates (see Stock  
240 Harvest Quota below), and 4) allocation of harvest in space (see Spatial Harvest Prosecution  
241 below). For this analysis, we defined a “collapse” as years with spawning biomass below 20%

242 of unfished biomass. We used this definition for herring because, 1) it is generally seen as a  
243 conservative estimate of biomass below which traditional Indigenous harvest becomes difficult  
244 and, 2) it lies below the current closure threshold of 25% unfished biomass. Alternative  
245 thresholds defining collapse were also assessed but yielded qualitatively similar results (data not  
246 shown).

247  
248 For all analyses, we simulated 10 populations placed around a hypothetical circular island of  
249 arbitrary size, where distances among adjacent populations were equal. Fish spawning at any  
250 site in a given year were able to move to any other site in the next year. The probability of  
251 migration from one site to another declines as alongshore distance between the locations  
252 increases and is controlled by a periodic kernel. Likewise, synchrony in stochastic recruitment  
253 among sites decays with distance between locations controlled by a periodic covariance kernel.  
254 Stochasticity in dynamics was included in recruitment (spatial and temporal variation), survival  
255 (temporal variation only) and movement probabilities (spatial and temporal variance). The order  
256 of operations mathematically was 1) recruitment, 2) survival, 3) movement, 4) roe fishery  
257 harvest, and 5) spawning. Details of the simulation are outlined below with core equations  
258 listed in Table 2 and definitions in Table 3.

259  
260 *Spatiotemporal Recruitment Dynamics*

261 Following the assumptions of the current British Columbia herring assessments (DFO 2015),  
262 recruitment of age 2 individuals at location  $i$  is a function of eggs produced 2-years prior and  
263 local density dependence via a Beverton-Holt model. We allowed recruitment to exhibit both  
264 spatial and temporal variability and autocorrelation with a first-order vector autoregressive

265 model. Spatial correlations in recruitment followed a Gaussian spatial decay with distance (d),  
266 and location specific recruitment variability was tuned such that net recruitment variability was  
267 approximately constant across scenarios (CV of metapopulation recruitment = 0.8; DFO 2015).

268

#### 269 *Annual Adult Survival and Migration Among Spawning Areas*

270 All adult survival occurred prior to movement into spawning locations, was constant in space  
271 and was randomly drawn from a beta-binomial with mean  $\lambda = 0.6$  with coefficient of variation of  
272 0.2 (DFO 2015). Survivors migrated to new spawning locations with a probability that decays  
273 with distance from the previous site, controlled by a periodic kernel, tuned to achieve the desired  
274 retention rate.

275

#### 276 *Stock Harvest Quota*

277 We followed the existing harvest control rules of Pacific herring in British Columbia (DFO  
278 2015). The annual biomass harvest quota for the stock ( $\hat{Q}_{t+1}$ ) was designed to achieve a target  
279 harvest rate ( $H_{\text{Target}}$ ) and a minimum spawning escapement (25% of  $B_0$  – the average steady  
280 state biomass without fishing). For simplicity and to avoid evaluating stock assessment model  
281 performance (which is out of the scope of this study) we assume forecasts are unbiased with no  
282 observation noise.

283

#### 284 *Spatial Harvest Prosecution*

285 We used and compared two spatial fleet allocation scenarios to generate the distribution of  
286 spatial commercial roe harvest given the stock quota: 1) the fleet prosecuted the fishery equally  
287 in space whereby the absolute harvest was directly proportional to spawning biomass within a

288 given year (*proportional allocation*) or 2) the fleet was allocated according to the ideal free  
289 distribution (IFD) that in theory would optimize catch efficiency if fleets are not spatially  
290 constrained (*optimized allocation* - See Appendix S3 for details in generating the IFD). Here,  
291 realized catch was nonlinearly related to spawning biomass, harvesting more from areas with  
292 higher biomass and leaving alone areas with lower biomass. See Appendix S3 for methods and  
293 results from a third allocation strategy, a random spatial allocation that is more similar to the  
294 fleet allocation in the empirical case study. In all cases, fishery selectivity was identical to  
295 maturity-at-age reflecting that harvest occurs on mature fish at the spawning grounds.

296

#### 297 *Simulation details*

298 For each simulation, we 1) evaluated deterministic equilibria without fishing, 2) initiated  
299 stochastic forcing of recruitment from the equilibrium for 12 years (allowing the full suite of age  
300 classes to be influenced by environmental stochasticity), 3) initiated the fishery in year 13, and 4)  
301 recorded performance metrics for years 23-52. We ran 100 replicate simulations for each  
302 combination of migration probability and recruitment synchrony. Primary performance metrics  
303 summarized for each simulation included a) mean number of years below 20%  $B_0$  at both stock  
304 and substock scales to assess risk of collapse, b) mean stock and substock level catch, c) mean  
305 stock and substock biomass, d) stock and substock temporal variability (coefficient of variation)  
306 in biomass, and e) mean spatial variation in biomass (difference between squared coefficient of  
307 variation at the substock versus stock scale).

308

## 309 **Results**

### 310 *Theoretical effects of harvest on spatial variability in metapopulations (Model 1)*

311 Our model illustrates that spatial variation among subpopulations increases with higher harvest  
312 rates (Fig. 1a) and decreases with synchronizing forces of migration and environmental  
313 correlation (difference in surfaces in Fig. 1b). As a result, the metapopulation trend and  
314 coefficient of variation are less reflective of trends and variation in its subpopulations as harvest  
315 increases (Fig. 1b). Biologically, this higher mortality rate decreases longevity and increases  
316 local-scale sensitivity to spatially explicit recruitment pulses. The amplification of fluctuations  
317 occurs at a higher rate at local scales than on aggregate. This response decreases spatial coupling  
318 and predictability. Reduced longevity of adults (via higher mortality) reduces the abundance of  
319 adults in each subpopulation that buffers against local stochasticity through survival and  
320 migration.

321

322 Mathematically, this result emerges for several related reasons. Increases in mortality (constant  
323 across space in this case) reduce local subpopulation inertia (predictability, measured as 1<sup>st</sup> order  
324 temporal autocorrelation, thick black line in Fig. 1c). This reduction in inertia increases  
325 subpopulation sensitivity to temporal variation in local subpopulation recruitment (red line in  
326 Fig. 1c). This sensitivity is illustrated by the primary impulse response at a single lag which in  
327 this case always increases with total mortality ( $Z$ ) derived from Eq. 5:

328 Eq. 22:  $(1 - \delta)/(1 + \sum_{a=1}^{n-1}(e^{-Z})^a)$

329



330 Such increases in local environmental sensitivity reduce spatial coupling (measured as the spatial  
331 autocorrelation, dotted black line in Fig. 1c) and thereby increase spatial variability in  
332 abundance.

333  
334 Importantly these patterns of spatial variability can persist even in the presence of modest  
335 migration rates (Fig. 1b). While spatial variability decreases with synchronizing forces of  
336 migration ( $\delta$ ) and environmental correlations ( $\rho_R$ ) (Fig. 1b, see Appendix S1 for solutions),  
337 spatial variability only diminishes as migration and environmental correlations are substantially  
338 high (i.e. as migration probabilities approach 0.5 to produce 100% mixing). This phenomenon  
339 is illustrated by the discrepancies between temporal variability of the metapopulation and  
340 component subpopulations that produce spatial variation (Fig. 1b).

341  
342 Next we illustrate challenges imposed by spatial variation in exploited metapopulations using an  
343 empirical case study of Pacific herring and present solutions using a numerical management  
344 strategy evaluation.

345  
346 ***Pacific herring case-study: spatial variability in biomass and catch (Model 2)***

347 Pacific herring subpopulations on the Central Coast of BC exhibit substantial spatial variability  
348 in subpopulation trends (Fig. 2a, b, c). The estimated biomass of individual (“local”)  
349 subpopulations has varied by more than an order of magnitude over the past three decades, and  
350 similar differences in biomass are evident among subpopulations in the same year. As a  
351 consequence, aggregate (“regional”) stock biomass at any one point in time is bolstered by a few  
352 subpopulations, while others linger at low levels (Fig. 2b, Appendix S2: Fig. S2). Synchrony in

353 biomass among subpopulations is low (0.29), with much higher variability at the subpopulations  
354 scale (average CV = 0.88) than in aggregate (CV = 0.54). This discrepancy results from high  
355 spatial variability in subpopulations trends (Fig. 1c - also known as  $\beta$  variability; (Wang and  
356 Loreau 2014). In fact as much as an estimated 91% of an individual subpopulation's biomass is  
357 harvested annually, though the aggregate exploitation rate fluctuates around the target of 20%  
358 (Fig. 2d, e, Appendix S2: Fig. S3). Counterproductively, this can result in occurrences where  
359 subpopulations experiencing periods of lower-than-average biomass are heavily exploited  
360 preceding collapse (e.g. Fig. 2d, in 2006). Harvest rates generally differ in magnitude among  
361 subpopulations in any given year (Appendix S2: Fig. S3) and higher harvest rarely focus on the  
362 subpopulations with highest biomass (Appendix S2: Fig. S3). This is illustrated directly by  
363 spatial harvest distributions that deviate substantially from baselines of spatial harvest evenness  
364 used here and in the simulation model (proportional vs optimized allocation - Appendix S2: Fig.  
365 S3). Next we explore the potential consequences of different spatial harvest distributions via a  
366 closed-loop simulation model.

367

368

### 369 *Solutions for spatial scale mismatches in fished herring metapopulations (Model 3)*

370 We used numerical simulation of a metapopulation to determine whether and under what  
371 conditions exploitation rates that appear sustainable in aggregate can risk collapse of local  
372 subpopulations, and by extension, adversely affect predators and the fishers who target them at  
373 this scale. The divergence in risk among scales, an effect of the mismatch in spatial scale, is  
374 controlled by the magnitude of harvest rates, allocation of harvest in space, annual migration,  
375 and spatial recruitment synchrony. Our simulations show that risk of collapse can be 10 times

376 greater at local subpopulation scales than at aggregate metapopulation scales (Fig. 3) for the 20%  
377 harvest rule. While it may seem intuitive that relatively modest adult migration would minimize  
378 differences in risk to subpopulations and the metapopulation, our results do not support this  
379 supposition. Even relatively high migration rates can impose substantial discrepancies in the risk  
380 of collapse between subpopulation and metapopulation scales (Fig. 3). This principle holds so  
381 long as spatial synchrony in recruitment is not exceedingly high (Fig. 3 upper portions of  
382 heatmaps). For most scenarios, high spatial variability (i.e. from low annual migration among  
383 subpopulations or low spatial recruitment synchrony) leads to low apparent risk at the aggregate  
384 metapopulation scale, despite high risk of collapse for local subpopulations (Fig. 3; risk increases  
385 towards the lower left quadrants).

386  
387 We find that risk to local subpopulations greatly exceeds risk to the aggregate metapopulation  
388 with both a simulated 10% and 20% target harvest rate. Under the 20% target harvest, risk of  
389 collapse at the local scale exceeds 10%, even with annual migration among subpopulations  
390 approaching 50% (Fig. 3 h). When harvest is optimized in space or target harvest rates are  
391 reduced to 10%, risks of collapse at local scales are substantially reduced (Fig. 3 d,f,j versus Fig.  
392 3 h) and limited to scenarios where migration is ~10-15% and spatial synchrony in recruitment is  
393 low. Local scale risks of collapse are even worse under a random (or opportunistic) spatial  
394 allocation, but also ameliorated by reductions in harvest (Appendix S3: Fig. S2). Importantly, a  
395 10% target harvest with optimized spatial allocation never exceeded 10% risk of collapse in our  
396 simulations.

397

398 The discrepancy in risk of collapse at local subpopulation versus aggregate metapopulation  
399 scales is shaped by both overall harvest rates and spatial variance in subpopulation trend (Fig.  
400 S5). Risk at the subpopulation scale matches that of metapopulation scales when subpopulations  
401 exhibit little spatial variance (i.e. when there is high recruitment synchrony or high migration,  
402 top vs bottom panels in Fig. 3 c-j, SI Fig. S6). In contrast, risk diverges with increases in spatial  
403 variance (Fig. S5). Spatial variance is shaped not only by spatial recruitment synchrony and  
404 migration, but also harvest rates and allocation in space. Fig. 4b-c illustrates how different  
405 harvest allocations impact spatial variation in trends (Fig. 4 d, e). Higher harvest rates increase  
406 risk at subpopulation scales in part because of higher depletion at the metapopulation scale (Fig.  
407 3 d,f,h,i) and also because harvest can increase spatial variance (Fig. 4d, also explored more  
408 generally in Fig. 1) when efforts are allocated proportionally. This result demonstrates how low  
409 demographic synchrony creates a portfolio effect at the metapopulation scale but simultaneously  
410 masks risks of collapse at the subpopulation scale which can be exacerbated with higher harvest  
411 rates.

412  
413 However, dynamically optimizing harvest rates in space to match local scale variability lowers  
414 the risk of subpopulation and aggregate metapopulation collapse (Fig. 3 d vs f and Fig. 3 h vs i)  
415 with no cost to aggregate catch (Appendix S3: Fig. S3). These results emerge from simulating a  
416 form of spatially optimized fishing effort that leaves underperforming locations unexploited and  
417 heavily targets overperforming local subpopulations, in accordance with predictions of ideal free  
418 distribution theory. Optimal spatial allocation of harvest rates reduces the effects of harvest  
419 intensity on spatial variability (Fig. 4d) which is strongly related to the bias in estimating risk  
420 among scales (Appendix S3: Fig. S1) and also reduces length of individual collapses (Appendix

421 S3: Fig. S3). Thus, approaches that optimize spatial harvest to account for subpopulation  
422 dynamics can minimize the spatially destabilizing effect of harvest as well as disparity in  
423 exposure to risk of collapse among spatial scales. The benefits of spatially optimized harvest in  
424 terms of risk to subpopulations diminishes as migration and spatial synchrony in recruitment  
425 productivity decline to low levels (i.e. approach the lower left quadrant of panels in Fig. 3 d,f,h,j,  
426 where subpopulations are nearly autonomous with low connectivity).

427

## 428 **Discussion**

429 Harvest strategies that appear appropriately prescribed at large spatial scales can, at local scales,  
430 lead to declines or even effective extirpation of local subpopulations. We call these small-scale  
431 declines “cryptic collapses”. Specifically, regional harvest strategies can create a “gilded trap”  
432 (Steneck et al. 2011) where, in this case, management focuses on the aspects of metapopulations  
433 that can benefit conservation and economics at the aggregate scale, but neglect social-ecological  
434 inequity in the exposure to risk at local scales. Our results show that spatial mismatch among  
435 scales is not merely an esoteric concern. Indeed, they occur in current management situations,  
436 and are supported by ecological theory we develop here. Our multiscale risk analysis highlights  
437 the impacts of scale mismatch on consumers and the potential value of optimized spatial  
438 management for sustainability and equity. Previous studies have also investigated spatial  
439 mismatches in fisheries contexts to understand consequences stemming from spatial mismatches  
440 among biological processes and available data, as well as the spatial implementation of fisheries  
441 for yield and measure of population status assessments (Cope and Punt 2011, McGilliard et al.  
442 2011, Spies et al. 2015, McGilliard et al. 2017). Our work expands on previous investigations by  
443 considering how spatial dynamics of fish and fisheries affect resource sustainability at multiple

444 spatial scales that are relevant to different species and fishing communities. Our models address  
445 this gap by building on existing research with increased biological realism to allow for 1) adult  
446 migration rates among subpopulations rather than only dispersal associated with recruitment (e.g.  
447 Cope and Punt 2011, McGilliard et al. 2011, Spies et al. 2015, McGilliard et al. 2017) ; 2) a  
448 range of complex spatio-temporal correlations in the stochastic populations dynamics (but see  
449 McGilliard et al. 2011 for an implementation of spatio-temporal variation in adult mortality); and  
450 3) a novel suite of fisheries spatial harvest strategies.

451

452 *Insights into the benefits of population portfolios to manage risk for different groups*

453

454 Our work adds critical resolution and understanding to the literature on portfolio effects that is  
455 focused on the benefits of spatial variability. Recent work viewing multiple populations as a  
456 “portfolio” of assets has shown benefits of maintaining a diversity of subpopulations with high  
457 asynchrony. These benefits include reducing local extinctions through so called ‘rescue effects’  
458 (Hill et al. 2002, Secor et al. 2009, Fox et al. 2017), providing increased stability in the form of  
459 food security for people or animals (Nesbitt and Moore 2016) and minimizing economic risks  
460 over large scales by minimizing variance in harvestable abundance (Schindler et al. 2010). Yet  
461 these portfolio analyses typically focus on the attributes of the aggregate metapopulation,  
462 whereas the risk of localized subpopulation collapse (e.g. depletion below a threshold of  
463 ecological functionality or socioeconomic value) affects the interests of locally constrained  
464 fishers and spatially constrained organisms with small home ranges. Using theory and data we  
465 show that the same spatial variation that leads to resilience at the metapopulation scale, when left

466 unaccounted for in management strategies, can also produce unforeseen negative consequences  
467 in the form of magnified spatial variation and local risk of collapse (see also Spies et al. 2015).  
468  
469 In the case of Pacific herring in the Central Coast of British Columbia, local reductions in some  
470 subpopulations occurred well before the entire stock showed substantial declines in the mid-  
471 2000s. These collapses had greater impact on spatially constrained groups; namely Indigenous  
472 communities for whom herring is a source of cultural and economic vitality (Brown and Brown  
473 2009, Gavreau et al. 2017). In contrast, mobile fishing fleets and transient predators should be  
474 less vulnerable to local depletion events in the short term. Such context dependent effects of  
475 ignoring spatial variation are exemplified through considering the dramatic differences in the  
476 spatial scale at which predators and fishers operate. Indigenous fishers are spatially constrained  
477 by boat size, fuel costs, and political/cultural boundaries (Fig 2a, Table 4, Harris 2000, von der  
478 Porten et al. 2016). In contrast, the commercial fleet of seine and gillnet fishers are highly mobile  
479 and can pursue fish throughout the region. Similarly, non-human predators of herring and  
480 herring roe have a diversity of home-ranges and therefore interact with herring at multiple scales  
481 (Table 4). Many predators rely on herring when they move inshore around spawning season.  
482 Many crustaceans (Hines 1982, Stone and O'Clair 2001), echinoderms (Mattison et al. 1976,  
483 Cieciel et al. 2009), rockfishes and lingcod (Jorgensen et al. 2006, Mitamura et al. 2009,  
484 Tolimieri et al. 2009, Beaudreau and Essington 2011, Green and Starr 2011, Freiwald 2012),  
485 harbor seals (Peterson et al. 2012, Ward et al. 2012), some seabirds (Peery et al. 2009, Barbaree  
486 et al. 2015, Lorenz et al. 2017), and some flatfishes (Moser et al. 2013), exhibit restricted  
487 patterns of movement and are likely to exploit one to several major subpopulations, but generally  
488 not the entire spatial distribution of the metapopulation (stock). In contrast, humpback whales

489 (Dalla Rosa et al. 2008, Kennedy et al. 2014), orcas (Hauser et al. 2007, Fearnbach et al. 2014),  
490 some seabirds (Pearce et al. 2005), sea lions (Merrick and Loughlin 1997, Fearnbach et al. 2014,  
491 Kuhn and Costa 2014), fur seals (Kuhn et al. 2014), halibut (Loher 2008, Seitz et al. 2011,  
492 Nielsen et al. 2014), and gadiforms (Wespestad et al. 1983, Hanselman et al. 2014, Rand et al.  
493 2014) can, given ranges reported, access the geographic area covered by the stock (Table 4, see  
494 DataS1:Appendix S4). Thus, herring provide food resources to groups with varying movement  
495 constraints. As a result, herring collapses that range from small-scale subpopulations to  
496 metapopulation-wide phenomena may have differential impacts on the diverse predators that  
497 depend on this resource. These spatial scale dependencies affect which fishing communities or  
498 species bear the brunt of management risks and who reaps the benefits from the portfolio payoff  
499 of regional metapopulation stability. These outcomes highlight that ignoring space can exclude  
500 critical social, ecological, and economic responses central to the triple bottom line (Elkington  
501 1994, Okamoto et al. 2019).

502  
503 Pacific herring fisheries on Canada's west coast provide an empirical case where the scale of  
504 regional stock assessments masked episodic local overexploitation and subpopulation collapses.  
505 Here, high local harvest rates appear to be commonplace even when local subpopulations are  
506 depleted presumably because of at least two key factors. First, schooling fish are easy to catch  
507 even at low abundances (Mackinson et al. 1997) and thus the quota is likely to be achieved even  
508 if the abundance of spawning fish in a particular location is small. Second, managers are  
509 challenged with fulfilling quotas with imperfect spatial information about spawning abundances.  
510 While high local harvest rates may have contributed to subsequent local collapses observed in  
511 this case study, quantifying other confounding demographics (i.e. spatial variation in stochastic



512 adult mortality) are necessary to explicitly test this hypothesis. While recent local collapses may  
513 have occurred in the absence of fishing, fishing is very likely imposing higher subpopulation  
514 sensitivity to any environmental or biotic influence on recruitment or survival by reducing adult  
515 longevity thereby eroding an important buffer against recruitment volatility (Essington et al.  
516 2015) that we show can contribute to spatial variation. Importantly, spatial variation may not  
517 only affect the localized groups. In the long term, assumptions of spatial homogeneity can  
518 generate biased estimates of total productivity (Takashina and Mougi 2015) that may lead to  
519 overly optimistic harvest strategies. Thus, high local harvest rates may produce sequential  
520 depletion over time that eventually erodes the principal of the stock with potential to generate  
521 collapse of the portfolio as a whole (Spies et al. 2015).

522

### 523 *Linking harvest dynamics to spatial variation in population dynamics*

524

525 Importantly, spatial variation in population dynamics is not independent of harvest dynamics.  
526 Rather, we demonstrate numerically and analytically that spatial variation is likely to increase  
527 with harvest. This can occur in part because harvesting reduces spatial coupling. Higher  
528 mortality is known to reduce the abundance of older age classes (Barnett et al. 2017) and  
529 increase sensitivity to fluctuations in recruitment (Beddington and May 1977, Bjørnstad et al.  
530 2004, Hsieh et al. 2006, Shelton and Mangel 2011, Okamoto et al. 2016). In spatially structured  
531 systems, such reduced longevity diminishes the synchronizing effect of migration and elevates  
532 sensitivity of subpopulations to localized environmental effects. However, if the distribution of  
533 harvest in space can be optimized to more adequately accommodate the spatial distribution of  
534 fish, we show how the overall portfolio can benefit at multiple scales. Here, demographic

535 asynchrony (in this case asynchrony in recruitment productivity) can be maintained while  
536 minimizing subpopulation risk. Translated into practice, our simulation and analytical results  
537 highlight two non-mutually exclusive solutions that provide more equitable spreading of risk  
538 among scales. First, reductions in overall harvest rates can ameliorate biases in risk among  
539 scales. This occurs by reducing baseline levels of risk and reducing effects of harvest on spatial  
540 variability. Second, spatially optimizing harvest allocations can minimize spatial variance and  
541 ease pressure on at-risk subpopulations, thereby reducing risk of local scale depletion without  
542 sacrificing catch. The first solution creates a trade-off between commercial yield and local risk;  
543 the second solution between the costs of management and fleet transportation, and local risk of  
544 subpopulation collapse. Specifically, achieving something similar to the latter (second solution)  
545 in a realistic setting is likely to require either some combination of greater investment in spatial  
546 monitoring, spatial stock assessments (Punt et al. 2018), and in season-management. Thus,  
547 moving in the direction of spatial optimization is likely to require substantial investment in costs  
548 and personnel for research, stock assessment, and management.

549  
550 Addressing spatial inequity in risk exposure requires confronting these economic and logistical  
551 trade-offs. For species such as Pacific herring that have volatile spatiotemporal dynamics and  
552 complex migratory phenology (Benson et al. 2015), polycentric governance structures where  
553 governing authorities are nested at different spatial scales may help balance these trade-offs by  
554 addressing the problems of fit between ecosystems, social systems, and management agencies  
555 (Young 2002, Berkes 2006, Borgström et al. 2006, Folke et al. 2007, Biggs et al. 2012, von der  
556 Porten et al. 2016). Such systems can capitalize on scale-specific ecological knowledge  
557 (including local, traditional, and scientific knowledge), scientific capacity and socioeconomic

558 experience to 1) guide decision analyses, 2) co-coordinate data collection and harvest allocation  
559 in space, and 3) test policies (e.g. in the Maine Lobster fishery (Acheson 2003)). Polycentric  
560 management schemes, however, are not a silver bullet. For systems like Pacific herring where  
561 placed-based Indigenous fishing communities often object to purely centralized scales of  
562 management for social, ecological, and economic reasons (Brown and Brown 2009, Thornton  
563 and Kitka 2015, von der Porten et al. 2016, Gavreau et al. 2017, von der Porten et al. 2019),  
564 opportunities to integrate knowledge and objectives into management strategies (and their  
565 evaluation) at smaller spatial scales is well placed in managing these fisheries, and may be  
566 critical to their perpetuity (Okamoto et al. 2019, Salomon et al. 2019).

567  
568 The models used to generate inference in this study are simple in comparison to the nature of  
569 complex stochastic systems in space. The analytical model (Model 1) makes numerous  
570 simplifications (linearization, biological simplicity) in order to generate analytical and  
571 generalizable solutions but may ignore more nuanced nonlinearities. The numerical model  
572 (Model 3) on the other hand is more detailed but outcomes are context dependent. Moreover,  
573 both models ignore many biological and management scenarios that are likely to further  
574 complicate spatial patterns (e.g. behaviorally or geographically complex migration (MacCall et  
575 al. 2018, Rogers et al. 2018), spatial and age specific mortality (McGilliard et al. 2011), spatially  
576 complex density dependence (McGilliard et al. 2017), Allee effects, cost, and data limitations for  
577 spatial management). We also ignore many alternative spatial allocation strategies that may be  
578 explicitly designed to maximize long-term yields or minimize spatiotemporal variability in part  
579 because these approaches would require a spatial assessment model, which is out of the scope of  
580 this study. However, the principles from our simulation and analytical models should generalize

581 regardless of the degree of complexity in the system: a precautionary approach cognizant of  
582 resource users across multiple spatial scales may necessitate the incorporation of some degree of  
583 locally based management to minimize spatial discrepancies in risk exposure. Our results  
584 highlight the need to consider diverse scenarios and incorporate fundamental biological attributes  
585 that may impact resource dynamics and people at different scales. Overall, our models suggest a  
586 mixture of management scales may be key to selecting and coordinating harvest levels in space  
587 to navigate towards sustainable and equitable outcomes (Cope and Punt 2011, Biggs et al. 2012).

588

### 589 *Conclusion*

590

591 Our analyses illustrate the importance of considering spatial dynamics for determining how to  
592 most effectively balance equity in management and conservation strategies aimed at achieving  
593 social, economic, and ecological outcomes (Halpern et al. 2013, Law et al. 2017). These issues  
594 are often ignored by centralized management and conservation initiatives focused on larger  
595 spatial scales. For over half a century, fisheries scientists have debated how best to exploit and  
596 conserve “mixed stocks” that have separate dynamics but are inseparable in space, with the aim  
597 of balancing conservation of weak stocks and maximizing total yields (Ricker 1958). Our work  
598 inverts this focus to metapopulations where subpopulations have inseparable dynamics but are  
599 separated in space. We show how, in these settings, exploitation can magnify local scale  
600 fluctuations and spatial variability. As a result, aggregate metrics poorly represent local scale  
601 dynamics and the risk of collapse at the local scale increases at a greater rate than the aggregate  
602 large scale. This phenomenon creates cryptic collapses with ensuing discrepancies in risk  
603 exposure. Fortunately, the magnitude of these discrepancies can potentially be controlled by

604 lowering harvest rates or seeking harvest dynamics that are spatially optimized. Overall, these  
605 conclusions are relevant not only to Pacific herring fisheries, but also to the great number of  
606 exploited natural resources that exhibit spatial structure and are valuable to species and people  
607 that operate on multiple scales.

608

609 **Acknowledgements:**

610 DKO was supported by a Strategic Partnership Grant from the National Sciences and  
611 Engineering Research Council (NSERC) of Canada to AKS and MHL and a first-year assistant  
612 professor (FYAP) award to DKO from the FSU Council on Research and Creativity. We thank  
613 the Gordon and Betty Moore Foundation for their support of AS, JSF, PSL, the Ocean Tipping  
614 Points project and the David and Lucille Packard Foundation for their support of PSL, the Tula  
615 Foundation for their support of MHL, and the Ocean Modeling Forum. We thank J. Cleary, S.  
616 Harper, M. Reid, K. Gladstone, B. Gladstone, K. Brown, and D. Neasloss for discussions that  
617 initiated and refined the research, A. Frid and A. Rassweiler for input on the manuscript, and S.  
618 Cox, L. Dee, L. Hauser, B. Hunt, S. Miller, I. McKechnie, S. Pau, T. Pitcher, E. Petrou, T.  
619 Francis, A. Punt and W. Smith for discussions that improved the research. We also thank the  
620 Heiltsuk and Haida First Nations for their partnership in the NSERC Strategic Partnership Grant  
621 and the Department of Fisheries and Oceans for providing herring spatial data.

622

623

624

625

626

627 **References**

- 628 Acheson, J. M. 2003. Capturing the commons: Devising institutions to manage the maine lobtser  
629 industry. University Press New England, Lebanon, NH.
- 630 Adams, B., and D. D. Kapan. 2009. Man bites mosquito: understanding the contribution of  
631 human movement to vector-borne disease dynamics. PloS one 4:e6763.
- 632 Barbaree, B. A., S. Nelson, and B. D. Dugger. 2015. Marine space use by marbled murrelets  
633 *Brachyramphus marmoratus* at a mainland fjord system in southeast Alaska. Marine  
634 Ornithology 116:173-184.
- 635 Barnett, L. A., T. A. Branch, R. A. Ranasinghe, and T. E. Essington. 2017. Old-Growth Fishes  
636 Become Scarce under Fishing. Current Biology 27:2843-2848. e2842.
- 637 Beaudreau, A., and T. Essington. 2011. Use of pelagic prey subsidies by demersal predators in  
638 rocky reefs: insight from movement patterns of lingcod. Marine biology 158:471-483.
- 639 Beddington, J. R., and R. M. May. 1977. Harvesting natural populations in a randomly  
640 fluctuating environment. Science 197:463-465.
- 641 Benson, A. J., S. P. Cox, and J. S. Cleary. 2015. Evaluating the conservation risks of aggregate  
642 harvest management in a spatially-structured herring fishery. Fisheries Research 167:101-  
643 113.
- 644 Berkes, F. 2006. From community-based resource management to complex systems: The scale  
645 issue and marine commons. Ecology and Society 11.
- 646 Biggs, R., M. Schluter, D. Biggs, E. L. Bohensky, S. BurnSilver, G. Cundill, V. Dakos, T. M.  
647 Daw, L. S. Evans, K. Kotschy, A. M. Leitch, C. Meek, A. Quinlan, C. Raudsepp-Hearne,  
648 M. D. Robards, M. L. Schoon, L. Schultz, and P. C. West. 2012. Toward Principles for

- 649 Enhancing the Resilience of Ecosystem Services. *Annual Review of Environment and*  
650 *Resources* 37:421-448.
- 651 Bjørnstad, O. N., R. M. Nisbet, and J. Fromentin. 2004. Trends and cohort resonant effects in  
652 age-structured populations. *Journal of animal ecology* 73:1157-1167.
- 653 Borgström, S., T. Elmqvist, P. Angelstam, and C. Alfsen-Norodom. 2006. Scale mismatches in  
654 management of urban landscapes. *Ecology and Society* 11.
- 655 Brown, F., and Y. K. Brown. 2009. Staying the course, staying alive - coastal First Nations  
656 fundamental truths: biodiversity, stewardship and sustainability. Biodiversity BC.,  
657 Victoria, BC.
- 658 Carpenter, B., A. Gelman, M. Hoffman, D. Lee, B. Goodrich, M. Betancourt, M. A. Brubaker, J.  
659 Guo, P. Li, and A. Riddell. 2016. Stan: A probabilistic programming language. *Journal of*  
660 *Statistical Software* 20.
- 661 Chadès, I., T. Martin, S. Nicol, M. Burgman, H. Possingham, and Y. Buckley. 2011. General  
662 rules for managing and surveying networks of pests, diseases, and endangered species.  
663 *Proceedings of the National Academy of Sciences* 108:8323-8328.
- 664 Chesson, P. 1998. Spatial scales in the study of reef fishes: a theoretical perspective. *Australian*  
665 *Journal of Ecology* 23:209-215.
- 666 Ciciel, K., B. J. Pyper, and G. L. Eckert. 2009. Tag retention and effects of tagging on  
667 movement of the giant red sea cucumber *Parastichopus californicus*. *North American*  
668 *Journal of Fisheries Management* 29:288-294.
- 669 Cope, J. M., and A. E. Punt. 2011. Reconciling stock assessment and management scales under  
670 conditions of spatially varying catch histories. *Fisheries Research* 107:22-38.

- 671 Cumming, G., D. H. Cumming, and C. Redman. 2006. Scale mismatches in social-ecological  
672 systems: causes, consequences, and solutions. *Ecology and Society* 11.
- 673 Dalla Rosa, L., E. Secchi, Y. Maia, A. Zerbini, and M. Heide-Jørgensen. 2008. Movements of  
674 satellite-monitored humpback whales on their feeding ground along the Antarctic  
675 Peninsula. *Polar Biology* 31:771-781.
- 676 Department of Fisheries and Oceans. 2015. Stock Assessment and Management Advice for BC  
677 Pacific Herring: 2015 Status and 2016 Forecast. . *Can. Sci. Adv. Sec. Res. Doc* 2015/038.
- 678 Elkington, J. 1994. Towards the sustainable corporation: Win-win-win business strategies for  
679 sustainable development. *California management review* 36:90-100.
- 680 Essington, T. E., P. E. Moriarty, H. E. Froehlich, E. E. Hodgson, L. E. Koehn, K. L. Oken, M. C.  
681 Siple, and C. C. Stawitz. 2015. Fishing amplifies forage fish population collapses.  
682 *Proceedings of the National Academy of Sciences* 112:6648-6652.
- 683 Fearnbach, H., J. W. Durban, D. K. Ellifrit, J. M. Waite, C. O. Matkin, C. R. Lunsford, M. J.  
684 Peterson, J. Barlow, and P. R. Wade. 2014. Spatial and social connectivity of fish-eating  
685 “Resident” killer whales (*Orcinus orca*) in the northern North Pacific. *Marine biology*  
686 161:459-472.
- 687 Flostrand, L. A., J. F. Schweigert, K. S. Daniel, and J. S. Cleary. 2009. Measuring and modelling  
688 Pacific herring spawning-site fidelity and dispersal using tag-recovery dispersal curves.  
689 *ICES Journal of Marine Science* 66:1754-1761.
- 690 Folke, C., L. Pritchard, F. Berkes, J. Colding, and U. Svedin. 2007. The problem of fit between  
691 ecosystems and institutions: Ten years later. *Ecology and Society* 12.
- 692 Fox, J. W., D. Vasseur, M. Cotroneo, L. Guan, and F. Simon. 2017. Population extinctions can  
693 increase metapopulation persistence. *Nature ecology & evolution* 1:1271.



- 694 Freiwald, J. 2012. Movement of adult temperate reef fishes off the west coast of North America.  
695 Canadian Journal of Fisheries and Aquatic Sciences 69:1362-1374.
- 696 Gavreau, A., D. Lepofsky, M. Rutherford, and M. Reid. 2017. “Everything revolves around the  
697 herring”: The Heiltsuk-herring relationship through time. Ecology and Society 22.
- 698 Gelman, A., and D. B. Rubin. 1992. Inference from iterative simulation using multiple  
699 sequences. Statistical Science 7:457-472.
- 700 Gelman, A., H. S. Stern, J. B. Carlin, D. B. Dunson, A. Vehtari, and D. B. Rubin. 2013. Bayesian  
701 data analysis. Chapman and Hall/CRC.
- 702 Green, K. M., and R. M. Starr. 2011. Movements of small adult black rockfish: implications for  
703 the design of MPAs. Marine Ecology Progress Series 436:219-230.
- 704 Halpern, B. S., C. J. Klein, C. J. Brown, M. Beger, H. S. Grantham, S. Mangubhai, M.  
705 Ruckelshaus, V. J. Tulloch, M. Watts, C. White, and H. P. Possingham. 2013. Achieving  
706 the triple bottom line in the face of inherent trade-offs among social equity, economic  
707 return, and conservation. Proceedings of the National Academy of Sciences 110:6229-  
708 6234.
- 709 Hanselman, D. H., J. Heifetz, K. B. Echave, and S. C. Dressel. 2014. Move it or lose it:  
710 movement and mortality of sablefish tagged in Alaska. Canadian Journal of Fisheries and  
711 Aquatic Sciences 72:238-251.
- 712 Harris, D. C. 2000. Territoriality, aboriginal rights, and the Heiltsuk spawn-on-kelp fishery. U.  
713 Brit. Colum. L. Rev. 34:195.
- 714 Hauser, D. D., M. G. Logsdon, E. E. Holmes, G. R. VanBlaricom, and R. W. Osborne. 2007.  
715 Summer distribution patterns of southern resident killer whales *Orcinus orca*: core areas  
716 and spatial segregation of social groups. Marine Ecology Progress Series 351:301-310.

- 717 Hill, M. F., A. Hastings, and L. W. Botsford. 2002. The effects of small dispersal rates on  
718 extinction times in structured metapopulation models. *The American Naturalist* 160:389-  
719 402.
- 720 Hines, A. H. 1982. Coexistence in a kelp forest: size, population dynamics, and resource  
721 partitioning in a guild of spider crabs (*Brachyura*, *Majidae*). *Ecological Monographs*  
722 52:179-198.
- 723 Hsieh, C., C. S. Reiss, J. R. Hunter, J. R. Beddington, R. M. May, and G. Sugihara. 2006.  
724 Fishing elevates variability in the abundance of exploited species. *Nature* 443:859-862.
- 725 Johnson, T., J. Wilson, C. Cleaver, and R. Vadas. 2012. Social-ecological scale mismatches and  
726 the collapse of the sea urchin fishery in Maine, USA. *Ecology and Society* 17.
- 727 Jones, R., C. Rigg, and E. Pinkerton. 2016. Strategies for assertion of conservation and local  
728 management rights: A Haida Gwaii herring story. *Marine Policy*.
- 729 Jorgensen, S. J., D. M. Kaplan, A. P. Klimley, S. G. Morgan, M. R. O'Farrell, and L. W.  
730 Botsford. 2006. Limited movement in blue rockfish *Sebastes mystinus*: internal structure  
731 of home range. *Marine Ecology Progress Series* 327:157-170.
- 732 Kendall, B. E., O. N. Bjørnstad, J. Bascompte, T. H. Keitt, and W. F. Fagan. 2000. Dispersal,  
733 environmental correlation, and spatial synchrony in population dynamics. *The American*  
734 *Naturalist* 155:628-636.
- 735 Kennedy, A. S., A. N. Zerbini, B. K. Rone, and P. J. Clapham. 2014. Individual variation in  
736 movements of satellite-tracked humpback whales *Megaptera novaeangliae* in the eastern  
737 Aleutian Islands and Bering Sea. *Endangered Species Research* 23:187-195.

- 738 Kuhn, C., R. Ream, J. Sterling, J. Thomason, and R. Towell. 2014. Spatial segregation and the  
739 influence of habitat on the foraging behavior of northern fur seals (*Callorhinus ursinus*).  
740 Canadian journal of zoology 92:861-873.
- 741 Kuhn, C. E., and D. P. Costa. 2014. Interannual variation in the at-sea behavior of California sea  
742 lions (*Zalophus californianus*). Marine Mammal Science 30:1297-1319.
- 743 Lande, R. 1988. Demographic models of the northern spotted owl (*Strix occidentalis caurina*).  
744 Oecologia 75:601-607.
- 745 Law, E. A., N. J. Bennett, C. D. Ives, R. Friedman, K. J. Davis, C. Archibald, and K. A. Wilson.  
746 2017. Equity trade-offs in conservation decision making. Conservation Biology.
- 747 Lepofsky, D., and M. Caldwell. 2013. Indigenous marine resource management on the  
748 Northwest Coast of North America. Ecological Processes 2:1-12.
- 749 Levin, P. S., T. B. Francis, and N. G. Taylor. 2016. Thirty-two essential questions for  
750 understanding the social–ecological system of forage fish: the case of Pacific Herring.  
751 Ecosystem Health and Sustainability 2.
- 752 Levin, S. A. 1992. The problem of pattern and scale in ecology: the Robert H. MacArthur award  
753 lecture. Ecology 73:1943-1967.
- 754 Lewandowski, D., D. Kurowicka, and H. Joe. 2009. Generating random correlation matrices  
755 based on vines and extended onion method. Journal of multivariate analysis 100:1989-  
756 2001.
- 757 Loher, T. 2008. Homing and summer feeding site fidelity of Pacific halibut (*Hippoglossus*  
758 *stenolepis*) in the Gulf of Alaska, established using satellite-transmitting archival tags.  
759 Fisheries Research 92:63-69.

- 760 Lorenz, T. J., M. G. Raphael, T. D. Bloxton, and P. G. Cunningham. 2017. Low breeding  
761 propensity and wide-ranging movements by marbled murrelets in Washington. *Journal of*  
762 *Wildlife Management* 81:306-321.
- 763 Lütkepohl, H. 2005. *New introduction to multiple time series analysis*. Springer, Berlin.
- 764 MacCall, A., T. Francis, D. Armitage, J. Cleary, S. Dressel, R. Jones, H. Kitka, L. Lee, J.  
765 McIsaac, P. Levin, D. Okamoto, M. Poe, A. Punt, S. Reifenhohl, A. Shelton, M. Miple,  
766 J. Silver, J. Schmidt, T. Thornton, R. Voss, and J. Woodruff. 2018. A heuristic model of  
767 learned migration behavior exhibits distinctive spatial and reproductive dynamics. *ICES*  
768 *Journal of Marine Science*. 76:598-608.
- 769 Mackinson, S., U. R. Sumaila, and T. J. Pitcher. 1997. Bioeconomics and catchability: fish and  
770 fishers behaviour during stock collapse. *Fisheries Research* 31:11-17.
- 771 Mangel, M., and P. S. Levin. 2005. Regime, phase and paradigm shifts: making community  
772 ecology the basic science for fisheries. *Philosophical Transactions of the Royal Society*  
773 *B: Biological Sciences* 360:95-105.
- 774 Marsh, D. M., and P. C. Trenham. 2001. Metapopulation dynamics and amphibian conservation.  
775 *Conservation biology* 15:40-49.
- 776 Martell, S., J. Schweigert, V. Haist, and J. Cleary. 2012. Moving towards the sustainable  
777 fisheries framework for Pacific herring: data, models, and alternative assumptions; *Stock*  
778 *Assessment and Management Advice for the British Columbia Pacific Herring Stocks:*  
779 *2011 Assessment and 2012 Forecasts*. *Can. Sci. Adv. Sec. Res. Doc* 136:163.
- 780 Mattison, J., J. Trent, A. Shanks, T. Akin, and J. Pearse. 1976. Movement and feeding activity of  
781 red sea urchins (*Strongylocentrotus franciscanus*) adjacent to a kelp forest. *Marine*  
782 *Biology* 39:25-30.

- 783 McGilliard, C. R., A. E. Punt, and R. Hilborn. 2011. Spatial structure induced by marine reserves  
784 shapes population responses to catastrophes in mathematical models. *Ecological*  
785 *applications* 21:1399-1409.
- 786 McGilliard, C. R., A. E. Punt, R. Hilborn, and T. Essington. 2017. Modeling the impacts of two  
787 age-related portfolio effects on recruitment variability with and without a marine reserve.  
788 *Ecological applications* 27:1985-2000.
- 789 McKechnie, I., D. Lepofsky, M. L. Moss, V. L. Butler, T. J. Orchard, G. Coupland, F. Foster, M.  
790 Caldwell, and K. Lertzman. 2014. Archaeological data provide alternative hypotheses on  
791 Pacific herring (*Clupea pallasii*) distribution, abundance, and variability. *Proceedings of*  
792 *the National Academy of Sciences* 111:E807-E816.
- 793 Melbourne, B. A., and P. Chesson. 2006. The scale transition: scaling up population dynamics  
794 with field data. *Ecology* 87:1478-1488.
- 795 Merrick, R. L., and T. R. Loughlin. 1997. Foraging behavior of adult female and young-of-the-  
796 year Steller sea lions in Alaskan waters. *Canadian Journal of Zoology* 75:776-786.
- 797 Mitamura, H., K. Uchida, Y. Miyamoto, N. Arai, T. Kakihara, T. Yokota, J. Okuyama, Y.  
798 Kawabata, and T. Yasuda. 2009. Preliminary study on homing, site fidelity, and diel  
799 movement of black rockfish *Sebastes inermis* measured by acoustic telemetry. *Fisheries*  
800 *Science* 75:1133-1140.
- 801 Moser, M. L., M. S. Myers, J. E. West, S. M. O'Neill, and B. J. Burke. 2013. English sole  
802 spawning migration and evidence for feeding site fidelity in Puget Sound, USA, with  
803 implications for contaminant exposure. *Northwest Science* 87:317-325.
- 804 Nesbitt, H. K., and J. W. Moore. 2016. Species and population diversity in Pacific salmon  
805 fisheries underpin indigenous food security. *Journal of Applied Ecology* 53:1489-1499.

- 806 Nielsen, J. K., P. N. Hooge, S. J. Taggart, and A. C. Seitz. 2014. Characterizing Pacific halibut  
807 movement and habitat in a Marine Protected Area using net squared displacement  
808 analysis methods. *Marine Ecology Progress Series* 517:229-250.
- 809 Nisbet, R. M., and W. Gurney. 1982. *Modelling fluctuating populations*. Wiley, New York.
- 810 Okamoto, D. K., M. R. Poe, T. B. Francis, A. E. Punt, P. S. Levin, A. O. Shelton, D. R.  
811 Armitage, J. S. Cleary, S. C. Dressell, R. Jones, H. Kitka, L. C. Lee, A. D. MacCall, J. A.  
812 McIsaac, S. Reifenstuhl, J. J. Silver, J. O. Schmidt, T. F. Thornton, R. Voss, and J.  
813 Woodruff. 2019. Attending to spatial social–ecological sensitivities to improve trade-off  
814 analysis in natural resource management. *Fish and Fisheries*.
- 815 Okamoto, D. K., R. J. Schmitt, and S. J. Holbrook. 2016. Stochastic density effects on adult fish  
816 survival and implications for population fluctuations. *Ecology letters* 19:153-162.
- 817 Pearce, J. M., J. A. Reed, and P. L. Flint. 2005. Geographic variation in survival and migratory  
818 tendency among North American Common Mergansers. *Journal of Field Ornithology*  
819 76:109-118.
- 820 Peery, M. Z., S. H. Newman, C. D. Storlazzi, and S. R. Beissinger. 2009. Meeting reproductive  
821 demands in a dynamic upwelling system: foraging strategies of a pursuit-diving seabird,  
822 the marbled murrelet. *The Condor* 111:120-134.
- 823 Peterson, D. A., R. Hilborn, and L. Hauser. 2014. Local adaptation limits lifetime reproductive  
824 success of dispersers in a wild salmon metapopulation. *Nature communications* 5.
- 825 Peterson, S. H., M. M. Lance, S. J. Jeffries, and A. Acevedo-Gutiérrez. 2012. Long distance  
826 movements and disjunct spatial use of harbor seals (*Phoca vitulina*) in the inland waters  
827 of the Pacific Northwest. *PloS one* 7:e39046.

- 828 Punt, A. E., D. K. Okamoto, A. D. MacCall, A. O. Shelton, D. R. Armitage, J. S. Cleary, I. P.  
829 Davies, S. C. Dressel, T. B. Francis, and P. S. Levin. 2018. When are estimates of  
830 spawning stock biomass for small pelagic fishes improved by taking spatial structure into  
831 account? *Fisheries research* 206:65-78.
- 832 Rand, K. M., P. Munro, S. K. Neidetcher, and D. G. Nichol. 2014. Observations of seasonal  
833 movement from a single tag release group of Pacific cod in the eastern Bering Sea.  
834 *Marine and Coastal Fisheries* 6:287-296.
- 835 Ricker, W. 1958. Maximum sustained yields from fluctuating environments and mixed stocks.  
836 *Journal of the Fisheries Board of Canada* 15:991-1006.
- 837 Rieman, B., and J. Dunham. 2000. Metapopulations and salmonids: a synthesis of life history  
838 patterns and empirical observations. *Ecology of Freshwater Fish* 9:51-64.
- 839 Rogers, L. A., A. K. Salomon, B. Connors, and M. Krkošek. 2018. Collapse, tipping points, and  
840 spatial demographic structure arising from the adopted migrant life history. *The*  
841 *American Naturalist* 192:49-61.
- 842 Salomon, A., A. Quinlan, G. Pang, D. Okamoto, and L. Vazquez-Vera. 2019. Measuring social-  
843 ecological resilience reveals opportunities for transforming environmental governance.  
844 *Ecology and Society* 24.
- 845 Schindler, D. E., R. Hilborn, B. Chasco, C. P. Boatright, T. P. Quinn, L. A. Rogers, and M. S.  
846 Webster. 2010. Population diversity and the portfolio effect in an exploited species.  
847 *Nature* 465:609-612.
- 848 Schtickzelle, N., and T. P. Quinn. 2007. A metapopulation perspective for salmon and other  
849 anadromous fish. *Fish and Fisheries* 8:297-314.

- 850 Secor, D. H., L. A. Kerr, and S. X. Cadrin. 2009. Connectivity effects on productivity, stability,  
851 and persistence in a herring metapopulation model. *ICES Journal of Marine Science*  
852 66:1726-1732.
- 853 Seitz, A. C., T. Loher, B. L. Norcross, and J. L. Nielsen. 2011. Dispersal and behavior of Pacific  
854 halibut *Hippoglossus stenolepis* in the Bering Sea and Aleutian Islands region. *Aquatic*  
855 *Biology* 12:225-239.
- 856 Shelton, A., J. Samhouri, A. Stier, and P. Levin. 2014. Assessing trade-offs to inform ecosystem-  
857 based fisheries management of forage fish. *Scientific Reports* 4.
- 858 Shelton, A. O., and M. Mangel. 2011. Fluctuations of fish populations and the magnifying  
859 effects of fishing. *Proceedings of the National Academy of Sciences* 108:7075-7080.
- 860 Siple, M. C., and T. B. Francis. 2016. Population diversity in Pacific herring of the Puget Sound,  
861 USA. *Oecologia* 180:111-125.
- 862 Spies, I., P. D. Spencer, and A. E. Punt. 2015. Where do we draw the line? A simulation  
863 approach for evaluating management of marine fish stocks with isolation-by-distance  
864 stock structure. *Canadian journal of fisheries and aquatic sciences* 72:968-982.
- 865 Stan Development Team. 2016a. RStan: the R interface to Stan. Version 2.10.1. <[http://mc-  
stan.org/rstan.html](http://mc-<br/>866 stan.org/rstan.html)>
- 867 Stan Development Team. 2016b. Stan: A C++ library for probability and sampling. Version  
868 2.12.0. <<http://mc-stan.org>>
- 869 Steneck, R., T. Hughes, J. Cinner, W. Adger, S. Arnold, F. Berkes, S. Boudreau, K. Brown, C.  
870 Folke, and L. Gunderson. 2011. Creation of a gilded trap by the high economic value of  
871 the Maine lobster fishery. *Conservation biology* 25:904-912.



- 872 Stephenson, R. L. 1999. Stock complexity in fisheries management: a perspective of emerging  
873 issues related to population sub-units. *Fisheries Research* 43:247-249.
- 874 Stone, R. P., and C. E. O'Clair. 2001. Seasonal movements and distribution of Dungeness crabs  
875 Cancer magister in a glacial southeastern Alaska estuary. *Marine Ecology Progress Series*  
876 214:167-176.
- 877 Takashina, N., and A. Mougi. 2015. Maximum sustainable yields from a spatially-explicit  
878 harvest model. *Journal of Theoretical Biology* 383:87-92.
- 879 Tanasichuk, R., A. Kristofferson, and D. Gillman. 1993. Comparison of some life history  
880 characteristics of Pacific herring (*Clupea pallasii*) from the Canadian Pacific Ocean and  
881 Beaufort Sea. *Canadian Journal of Fisheries and Aquatic Sciences* 50:964-971.
- 882 Thornton, T. F., and H. Kitka. 2015. An indigenous model of a contested Pacific Herring fishery  
883 in Sitka, Alaska. *International Journal of Applied Geospatial Research* 6:94-117.
- 884 Tolimieri, N., K. Andrews, G. Williams, S. Katz, and P. Levin. 2009. Home range size and  
885 patterns of space use by lingcod, copper rockfish and quillback rockfish in relation to diel  
886 and tidal cycles. *Marine Ecology Progress Series* 380:229-243.
- 887 von der Porten, S., J. Corntassel, and D. Mucina. 2019. Indigenous nationhood and herring  
888 governance: strategies for the reassertion of Indigenous authority and inter-Indigenous  
889 solidarity regarding marine resources. *AlterNative: An International Journal of*  
890 *Indigenous Peoples*:1177180118823560.
- 891 von der Porten, S., D. Lepofsky, D. McGregor, and J. Silver. 2016. Recommendations for marine  
892 herring policy change in Canada: Aligning with Indigenous legal and inherent rights.  
893 *Marine Policy* 74:68-76.

- 894 Wang, S., and M. Loreau. 2014. Ecosystem stability in space:  $\alpha$ ,  $\beta$  and  $\gamma$  variability. Ecology  
895 letters 17:891-901.
- 896 Ward, E. J., P. S. Levin, M. M. Lance, S. J. Jeffries, and A. Acevedo-Gutiérrez. 2012. Integrating  
897 diet and movement data to identify hot spots of predation risk and areas of conservation  
898 concern for endangered species. Conservation Letters 5:37-47.
- 899 Wespestad, V. G., K. Thorsen, and S. Mizroch. 1983. Movement of sablefish, *Anoplopoma*  
900 *fimbria*, in the northeastern Pacific Ocean as determined by tagging experiments (1971-  
901 80). Fishery Bulletin 81:415-420.
- 902 Young, O. R. 2002. The institutional dimensions of environmental change: fit, interplay, and  
903 scale. MIT press.
- 904

905 Table 1: Equations used in Model 2 (Pacific herring case-study: spatial variability in biomass and  
906 catch)

| Eq                               | Description                                                                            | Equation                                                                                                                                          |
|----------------------------------|----------------------------------------------------------------------------------------|---------------------------------------------------------------------------------------------------------------------------------------------------|
| Eq. 8                            | Expected pre-spawn biomass                                                             | $\hat{b}_{t+1,l}^+ = \exp(\alpha_l + (1 - \beta_l) \ln(b_{t-1,l})) + \lambda_l b_{t,l}$                                                           |
| Eq. 9                            | Estimated log-biomass                                                                  | $\ln \mathbf{b}_t^+ = \ln(e^{\ln \mathbf{b}_t} + \mathbf{h}_t) \sim \text{MVN}(\ln \hat{\mathbf{b}}_t^+, \text{diag}(\boldsymbol{\sigma}))\Omega$ |
| Eq. 10                           | Objective function                                                                     | $\ell = \sum_{t=1}^T \sum_{l=1}^L \frac{(\ln(\text{obs}[b_{t,l}]) - (\ln b_{t,l} + \ln q))^2}{(2\sigma_{obs}^2)} - \ln( d )$                      |
| Eq. 11                           | Jacobian adjustment for change of variables in Eq. 10                                  | $d = \frac{\partial}{\partial \ln b_{t,l}} \ln(e^{\ln b_{t,l}} + h_{t,l}) = \frac{b_{t,l}}{b_{t,l} + h_{t,l}}$                                    |
| Symbol                           | Description                                                                            | Prior or Data Source                                                                                                                              |
| $\alpha_l$                       | Site-specific Gompertz productivity                                                    | $[\alpha_l \text{ logit}(\beta_l) \text{ logit}(\lambda_l)]' \sim \text{MVN}(\boldsymbol{\Theta}, \boldsymbol{\sigma}_{\Theta}\Omega_{\Theta});$  |
| $\beta_l$                        | Site-specific Gompertz compensation                                                    |                                                                                                                                                   |
| $\lambda_l$                      | Site-specific aggregate mortality & somatic growth                                     |                                                                                                                                                   |
| $\boldsymbol{\Theta}$            | Mean vector for $\alpha$ , $\text{logit}(\beta)$ , and $\text{logit}(\lambda)$         | $\boldsymbol{\Theta} \sim \text{MVN}(0, \text{diag}(1.5)\Omega_{\bar{\Theta}});$                                                                  |
| $\boldsymbol{\sigma}_{\Theta_l}$ | Among site variances in $\alpha$ , $\text{logit}(\beta)$ , and $\text{logit}(\lambda)$ | $\boldsymbol{\sigma}_{\Theta_l} \sim \text{half-cauchy}(0, 2.5)$                                                                                  |
| $\Omega$                         | Process error spatial corr. matrix                                                     | LKJ prior (Lewandowski et al. 2009): scale = 2                                                                                                    |
| $\Omega_{\Theta}$                | parameter corr. matrix                                                                 |                                                                                                                                                   |
| $\Omega_{\bar{\Theta}}$          | mean parameter corr. matrix                                                            |                                                                                                                                                   |
| $\boldsymbol{\sigma}$            | Vector of site-specific lognormal process variances                                    | $\sigma_l \sim \text{normal}(\sigma_{\mu}, 0.15); \sigma_{\mu} \sim \text{normal}(0, 0.15)$                                                       |
| $\sigma_{obs}$                   | Lognormal obs. error                                                                   | $\sigma_{obs} \sim \text{half-cauchy}(0, 2.5)$                                                                                                    |
| $\ln q$                          | Survey bias (egg “catchability”)                                                       | $\ln q \sim \text{normal}(0, 0.05)$ (Martell et al. 2012)                                                                                         |
| $\text{obs}[b_{t,l}]$            | Input Data                                                                             | observed spawning biomass at time t at location l                                                                                                 |
| $h_{t,l}$                        | Input Data                                                                             | harvest at time t at location l                                                                                                                   |

907 Table 2: Equations used in Model 3 (Solutions for spatial scale mismatches in fished herring  
 908 metapopulations). See Table 3 for parameter values and definitions.

909

| Eq     | Description                                      | Equation                                                                                                                                                                                                                                                               |
|--------|--------------------------------------------------|------------------------------------------------------------------------------------------------------------------------------------------------------------------------------------------------------------------------------------------------------------------------|
| Eq. 12 | Recruits (age 2) prior to movement               | $n_{a=2,l,t+2}^{++} = \text{eggs}_{l,t} \exp \left[ \epsilon_{l,t} - \frac{\sigma_r^2}{2} \right] / (\alpha + \beta \text{eggs}_{l,t})$                                                                                                                                |
| Eq. 13 | Total eggs laid                                  | $\text{eggs}_{l,t} = \sum_{a=2}^{10} m_a f_a [0.5 n_{a,l,t}]$                                                                                                                                                                                                          |
| Eq. 14 | Environmental recruitment stochasticity          | $\epsilon_t = \phi \epsilon_t + \text{MVN}(0, \sigma_r^2 [1 - \phi^2] \Omega_r)$                                                                                                                                                                                       |
| Eq. 15 | Spatial correlation in recruitment stochasticity | $\rho_{i,j} = \exp \left( -\frac{2 \sin^2 \pi   \text{dist}_{i \rightarrow j}  }{\eta^2} \right)$                                                                                                                                                                      |
| Eq. 16 | Pre-harvest abundance                            | $n_{a,l,t+1}^{++} = \begin{cases} \lambda_t n_{a-1,l,t} & 2 < a < 10 \\ \lambda_t n_{a-1,l,t} + \lambda_t n_{a,l,t} & a = 10 \text{ (plus group)} \end{cases}$                                                                                                         |
| Eq. 17 | Post-migration abundance                         | $N_t^+ = N_t^{++} S; S_{i,j} = P(i \rightarrow j)$                                                                                                                                                                                                                     |
| Eq. 18 | Recruit or Adult migration by distance function  | $P(i \rightarrow j) = \exp \left( -\frac{2 \sin^2 \pi   \text{dist}_{i \rightarrow j}  }{\gamma^2} \right) \sum_{j=1}^N \exp \left( -\frac{2 \sin^2 \pi   \text{dist}_{i \rightarrow j}  }{\gamma^2} \right)^{-1}$                                                     |
| Eq. 19 | Quota                                            | $\hat{Q}_{t+1} = \begin{cases} \min(H_{\text{target}} * \hat{B}_{\text{forecast},t}, \hat{B}_{\text{forecast},t} - L_{\text{crit}} * \hat{B}_{0,t}) & \text{if } \hat{B}_{\text{forecast},t} \geq L_{\text{crit}} * \hat{B}_{0,t} \\ 0 & \text{otherwise} \end{cases}$ |
| Eq. 20 | Post-harvest abundance at age in year t          | $n_{a,l,t} = (1 - m_a) n_{a,l,t}^+ - m_a n_{a,l,t}^+ e^{-F_{t,l}}; F_{t,l} = \ln h_{t,l} / \sum_{a=2}^{10} w_a m_a n_{a,l,t}^+$                                                                                                                                        |
| Eq. 21 | Biomass at location l in year t                  | $B_{l,t} = \sum_{a=2}^{10} w_a m_a n_{a,l,t}^+$                                                                                                                                                                                                                        |

910

911 Table 3: List of key parameters and state-variables in Model 3 with definitions, values and  
 912 citations. Note that equilibrium considerations are generated by simulating with no harvest and  
 913 no stochasticity ( $\sigma_r = 0$ , cv in  $\lambda_t = 0$ , and harvest = 0). Selectivity-at-age in all cases is equal to  
 914 maturity-at-age.

| Parameter                  | Description                                                                                                     | Value(s)                                                          | Source         |
|----------------------------|-----------------------------------------------------------------------------------------------------------------|-------------------------------------------------------------------|----------------|
| $\alpha, \beta$            | Beverton-Holt stock-recruit parameters                                                                          | 583.43, $2.089 \times 10^{-8}$                                    | 1              |
| $\phi$                     | 1 <sup>st</sup> order partial autocorrelation                                                                   | 0.6                                                               | Chosen         |
| $m_a$                      | Maturity-at-age (=Selectivity-at-age)                                                                           | Age 1 = 0, Age 2= 0.2, Age 3=0.9, Age 4 + = 1                     | 2              |
| $w_a$                      | Weight-at-age                                                                                                   | $4.5 \times 10^{-6} [27(1-\text{Exp}(-0.48*\text{age}))]^{3.127}$ | 3              |
| $f_a$                      | Fecundity-at-age                                                                                                | $\exp(4.69)(1000w_a)^{1.13}$                                      | 3              |
| $\lambda_t$                | Annual pre-harvest survival rate                                                                                | Beta-binomial: mean = 0.6, cv= 0.2                                | Derived from 1 |
| $\sigma_r$                 | Stock-scale standard deviation of rec-devs                                                                      | 0.8                                                               | 1              |
| $\eta$                     | Scale parameter regulating distance decay in rec-dev spatial covariance                                         | Numerically tuned to achieve desired spatial correlations         | Chosen         |
| $L_{crit}$                 | Lower biomass threshold for fishing closure relative to $\hat{B}_0$                                             | 0.25                                                              | 1              |
| $\bar{P}(i \rightarrow j)$ | Mean migration probability                                                                                      | 0.01 to 0.8                                                       | Chosen         |
| $\bar{\rho}_{i,j}$         | Spatial synchrony in recruitment                                                                                | 0.15 to 0.85                                                      | Chosen         |
| <b>State Variable</b>      | <b>Description</b>                                                                                              |                                                                   |                |
| $n_{a,l,t}^{++}$           | Abundance at age $a$ in time $t$ at location $l$ prior to movement and harvest (Eq. 16)                         |                                                                   |                |
| $n_{a,l,t}^+$              | Abundance after movement and prior to harvest (Eq. 17)                                                          |                                                                   |                |
| $F_{t,l}$                  | Fishing mortality of susceptible fish at time $t$ at location $l$ after movement and natural mortality (Eq. 20) |                                                                   |                |

915 1: (Department of Fisheries and Oceans 2015)

916 2: (Martell et al. 2011)

917 3: (Tanasichuk et al. 1993)

918 Table 4: Home-range categories of different Pacific herring predator groups. Details of sources  
 919 and home-ranges are provided in the DataS1:Appendix S4.

920

| Home-Range Category | Home-Range Description                                 | Herring Predator Groups                                                                                      |
|---------------------|--------------------------------------------------------|--------------------------------------------------------------------------------------------------------------|
| Localized           | single subpopulation<br>( <i>&lt; 10 km radius</i> )   | Indigenous fishers**, Seabirds*, Flatfishes*, Crustaceans*, Urchins, Cucumbers, Reef Fishes, Rockfishes      |
| Centralized         | multiple subpopulations<br>( <i>~10-40 km-radius</i> ) | Indigenous fishers**, Seabirds*, Flatfishes*, Crustaceans*, Gadiforms*, Salmonids**, Halibut**, Harbor Seals |
| Transient           | full stock or greater                                  | Seine & Gillnet Fishers, Cetaceans, Sea Lions, Seabirds*, Gadiforms*, Salmonids**, Halibut**                 |

921

922 \*Varies by species, \*\* Varies by migration phase, location or individual

923

924 List of Figures:

925 Figure 1: Effect of elevating harvest mortality rate on asynchrony related spatial variability in the  
926 metapopulation from Model 1. **(a)** Spatial variation increases as a function of total mortality for  
927 different levels of spatial synchrony in recruitment productivity. Here migration is held at 0.25  
928 and log-scale recruitment variability ( $\sigma_R$ ) is 0.7 (i.e. CV = 0.8). Note spatial variation is a result  
929 of the discrepancy in population versus metapopulation temporal variation in panel  
930 **(b)**; **(b)** Temporal variability (squared coefficient of variation) of the population and  
931 metapopulation. The arrows illustrate spatial variability as the difference between  
932 surfaces. **(c)** Measures of local population predictability (measured by first order within  
933 population autocorrelation, thick black line), among population coupling (measured by among  
934 population correlations, thin black line), and local environmental sensitivity (measured by the  
935 response at the population level to a unit environmental impulse affecting recruitment  
936 productivity, red line).

937

938 Figure 2: **(a)** Map of major Pacific Herring spawning substocks ("Sections" - denoted by  
939 different symbols) as defined by Canada's Federal Fisheries Agency in the Central Coast of  
940 British Columbia. Indigenous communities noted with \*. **(b)** Trends for the six main  
941 supopulations (substocks - thin colored lines & points) and the metapopulation (stock) mean  
942 (thick blue line). Trends were estimated using multivariate hierarchical Bayesian state-space  
943 model integrating spawn surveys and catch information (model 2). Individual plots for each  
944 substock are shown, along with catch, spawn observations, and 95% posterior credible intervals  
945 in Appendix S2. **(c)** Temporal coefficients of variation estimated from the Bayesian state-space  
946 mode over 25 years for each substock, the mean of each substock CV (large black symbol), the

947 regional stock coefficient of variation (blue point), and the spatial variability (black point with  
948 error bar) which is the standardized variance of the system after accounting for the variance of  
949 the stock and the variance of the substock means. Error bars are 95% credibility intervals. (d)  
950 Trends in annual harvest rate for 2 of the 6 local substocks (Higgins and Lower Spiller) with  
951 points, 95% credibility intervals and the mean for the aggregate stock (thick blue line). For full  
952 results see Appendix S2. The dotted line represents the target harvest rate of 20%.

953

954 Figure 3: Mean risk of collapse (%) at metapopulation and subpopulation scales for different  
955 harvest rates and spatial harvest allocation strategies under varying spatial scenarios. Results are  
956 derived from simulation-based risk analysis of hypothetical Pacific herring fisheries. Axes  
957 present simulations with different levels of annual migration and spatial synchrony in  
958 recruitment productivity, columns represent different harvest strategies and rows represent the  
959 spatial scales of inference. Risk of collapse is the probability of falling below 20% of unfished  
960 equilibrium (i.e. the dotted lines in Fig. 4 a-c); at the subpopulation scale, risk is measured as the  
961 mean probability of collapse for each population. *Optimized allocation* harvests proportionally  
962 more from subpopulations with higher biomass; *Proportional allocation* removes the same  
963 proportion of biomass from each subpopulation. Annual migration is the mean percent of each  
964 subpopulation that emigrates each year and spatial synchrony is the mean pairwise correlation in  
965 recruitment productivity. For full results see Appendix S3: Fig. S2. Note that the allocation  
966 strategies produce equivalent average yields (Figure 3c vs. 3e and 3g vs. 3i; see Appendix S3:  
967 Fig. S3 for yield comparisons). For an illustration of how alternative strategies affect the mean  
968 duration of collapses, see Appendix S3: Fig. S4.

969



970 Figure 4: **(a-c)** Example simulations (a single simulation run) showing spatial variation in  
971 biomass measured at the subpopulation level (colored lines) or metapopulation mean (thick blue)  
972 for **(a)** an unexploited metapopulation, **(b)** a 20% target harvest allocated proportional to  
973 spawning biomass in space, or **(c)** a 20% target harvest allocated optimally in space according to  
974 the ideal free distribution (see Appendix S3: Fig. S4 for summaries across runs).  $B_0$  =  
975 deterministic biomass in the absence of fishing, dotted line = lower conservation threshold of  
976 20% of  $B_0$ . **(d)** change in spatial variation for different harvest rates and spatial harvest allocation  
977 across different spatial parameter scenarios for migration rates and spatial synchrony. Each point  
978 represents the spatial variance from 100 runs from a single 52-year simulation using a unique  
979 migration-synchrony parameter combination.  
980

Figure 1

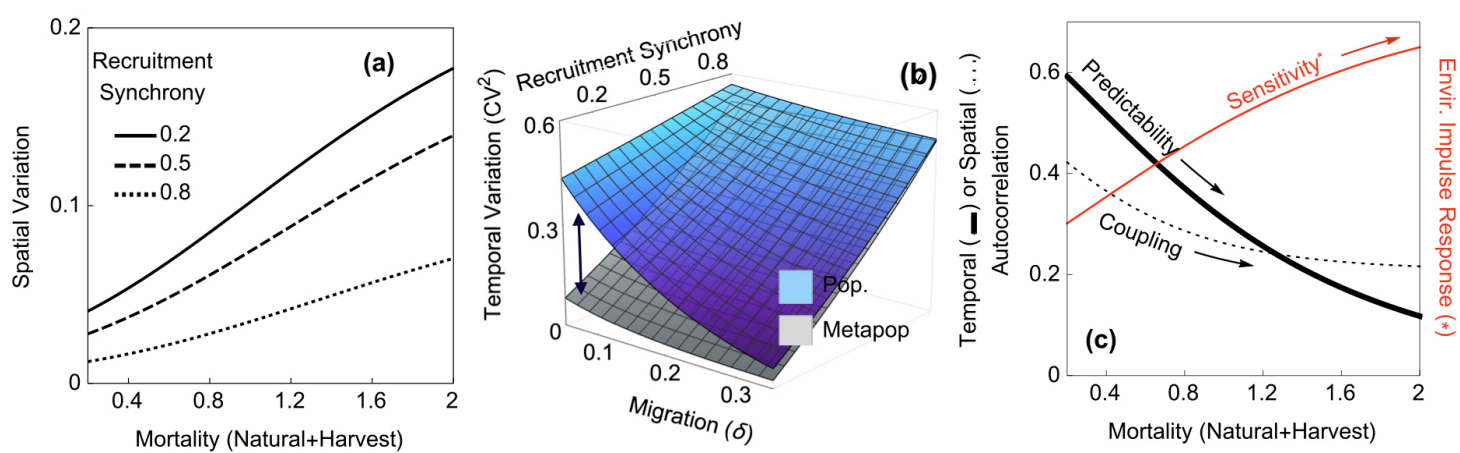

Figure 2

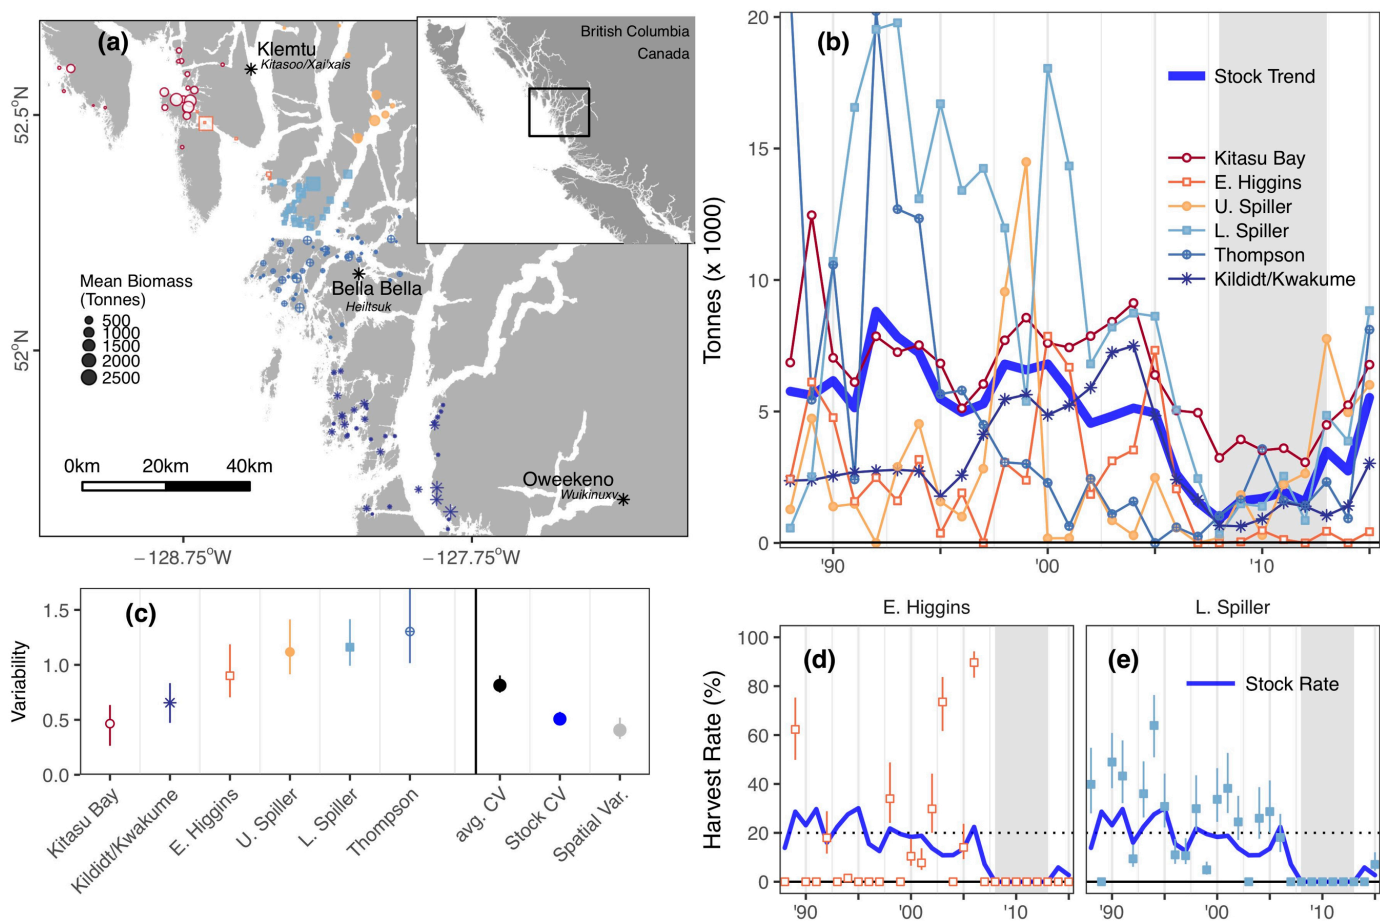

Figure 3

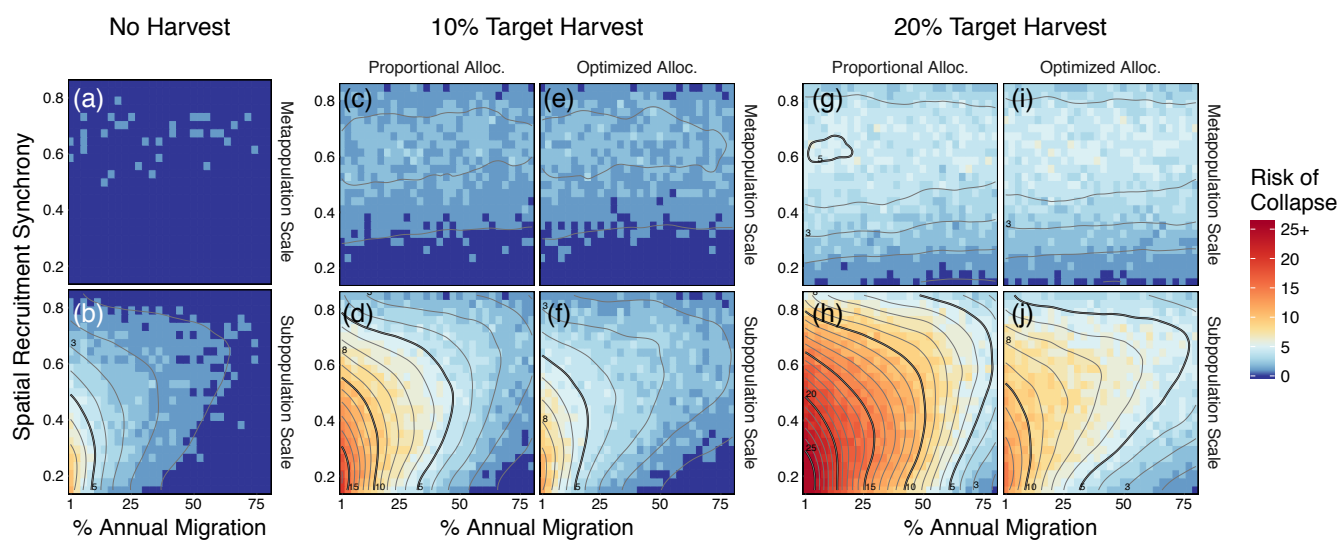

Figure 4

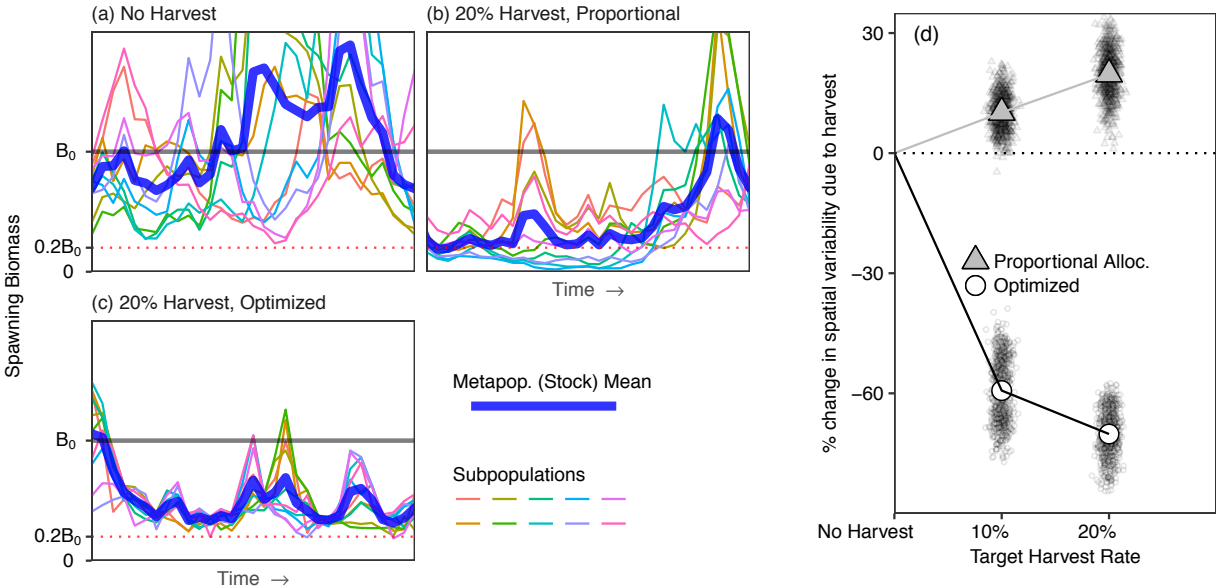

Source: https://www.biorxiv.org/content/10.1101/315481v2.full.pdf
